# Supplementary material
Source: PubMed Central journal article supplement (PMC6682025)
Supplement: ao9b00364_si_001.pdf [file ao9b00364_si_001.pdf]

*Supporting Information*

**Gene source screening as a tool for naringenin production in engineered *Saccharomyces cerevisiae***

Rita Mark<sup>1</sup>, Xiaomei Lyu<sup>1</sup>, Kuan Rei Ng<sup>1</sup>, Wei Ning Chen<sup>1\*</sup>

<sup>1</sup>School of Chemical and Biomedical Engineering, Nanyang Technological University,  
Singapore

\* Corresponding author: Wei Ning Chen

**Address:** School of Chemical and Biomedical Engineering, College of Engineering, Nanyang Technological University, 62 Nanyang Drive, Singapore 637459, Singapore

**Email:** WNCHEN@NTU.EDU.SG (WNC)

**Tel:** (+65)6316 2870

## Supplementary results

### Western Blot

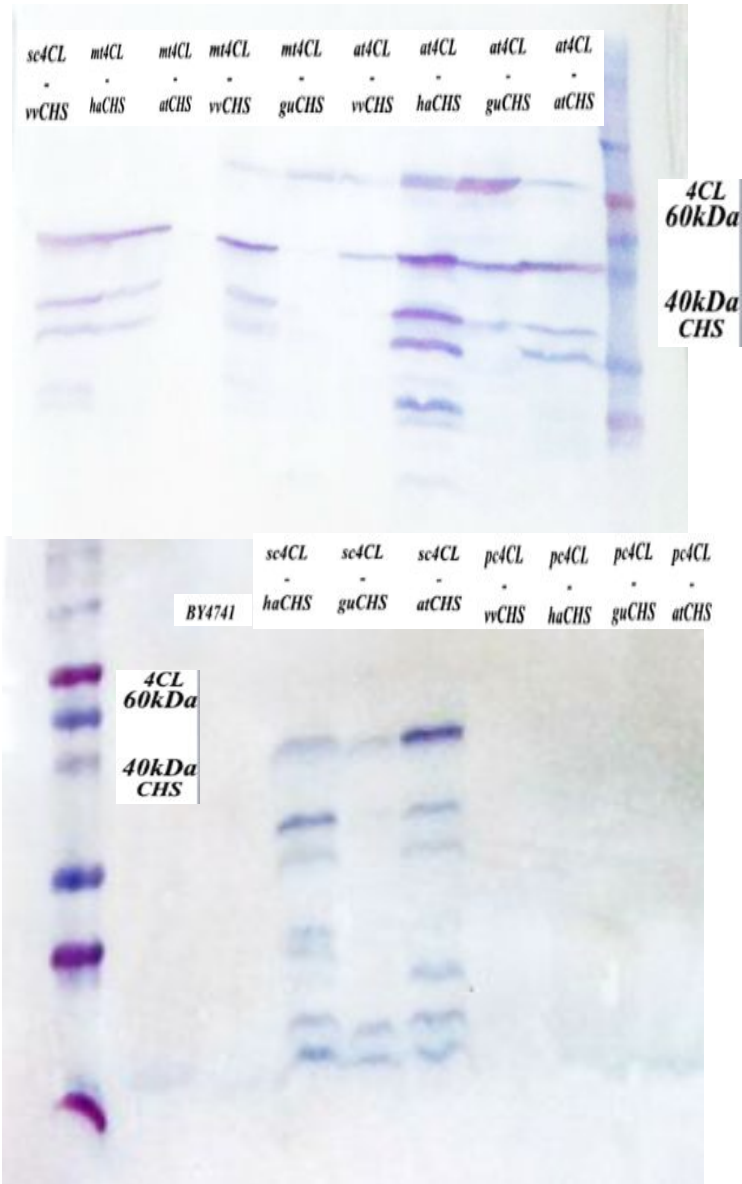

Figure S1. Western blot results of the sixteen strains expressed in *S. cerevisiae*

## GC-MS Chromatography

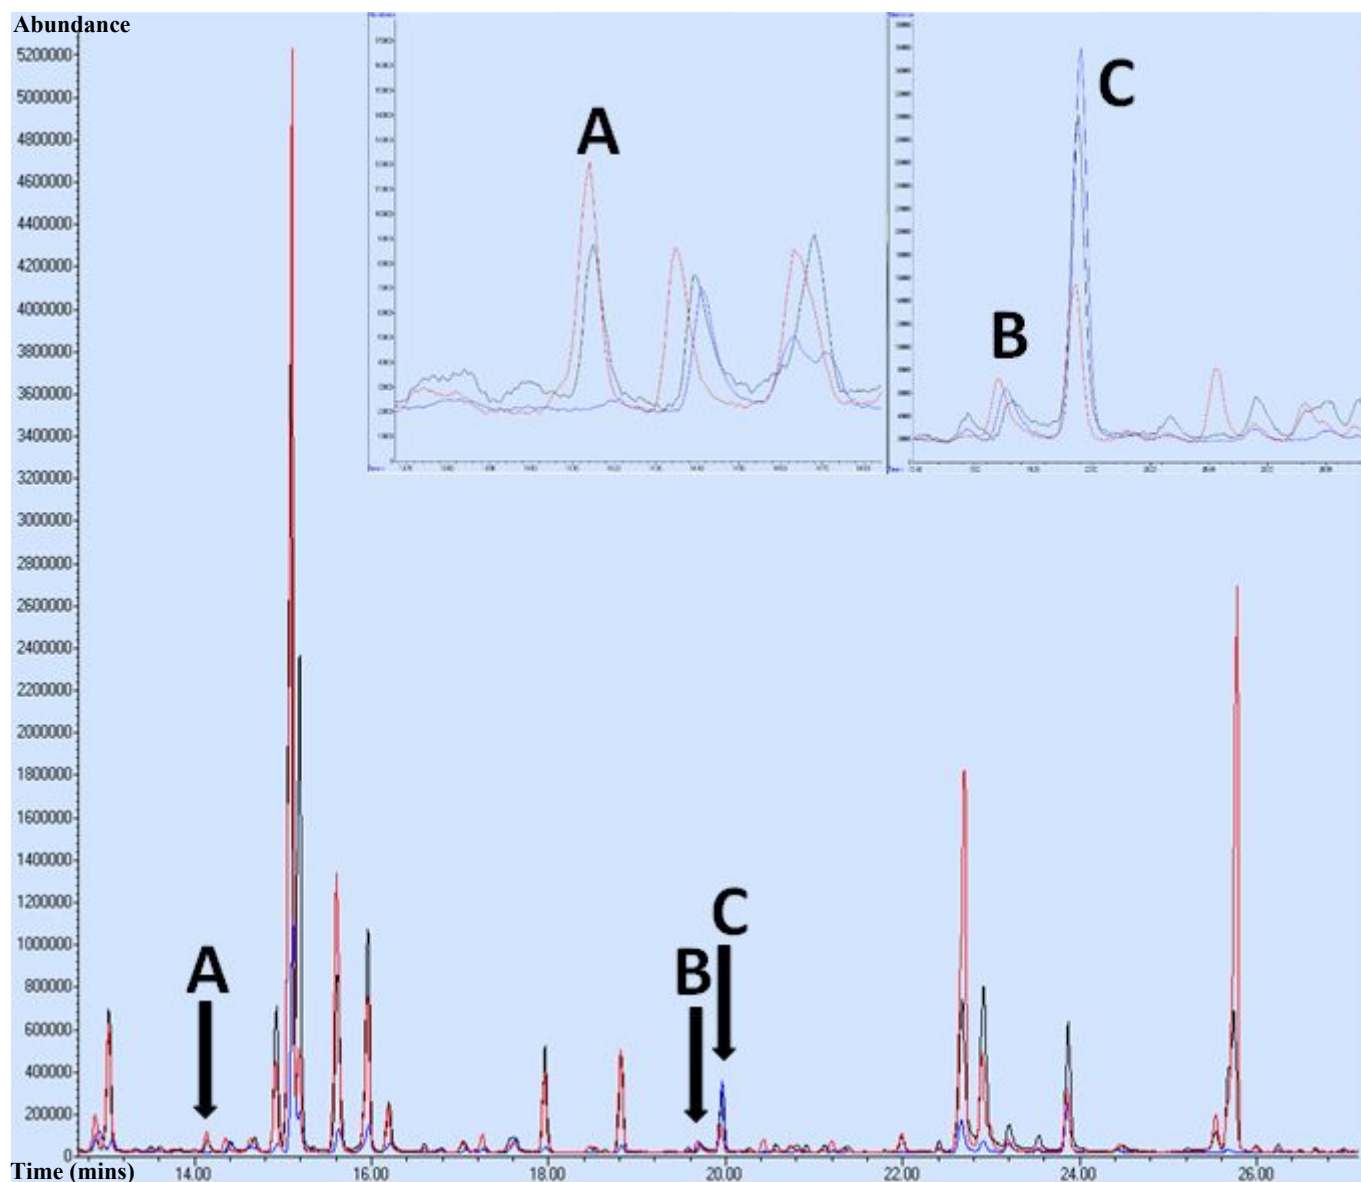

**Figure S2. GC-MS chromatography overlay example for two naringenin producing strains and a control.** A: Serine (retention time: 14.35 mins) B: L-Aspartate (retention time: 19.7 mins) C: Glycine (retention time: 19.95 mins) Black chromatograph: pCEV-G1-Km-at4CL-haCHS. Blue chromatograph: pCEV-G1-Km-rt4CL-vvCHS. Red chromatograph: Control.
